# Supplementary material
Source: PubMed Central journal article supplement (PMC5741430)
Supplement: supp_5.4.E740_2017-0055-1-at.pdf [file supp_5.4.E740_2017-0055-1-at.pdf]

Appendix 1 (as supplied by the authors): Location of screen test-EACS clinics during the pilot.

| Clinic Location (Clinic Year)                                                            | Other Communities in Screen Test Catchment |                               |                              |                                    |
|------------------------------------------------------------------------------------------|--------------------------------------------|-------------------------------|------------------------------|------------------------------------|
| <b><i>The clinics below offered Cervical, Colorectal and Breast Cancer Screening</i></b> |                                            |                               |                              |                                    |
| Athabasca (2015)*                                                                        | Calling Lake<br>Perryvale<br>White Gull    | Colinton<br>South Baptiste    | Island Lake<br>Sunset Beach  | Island Lake South<br>West Baptiste |
| High Level (2014)*                                                                       | Chatech<br>Paddle Prairie                  | Habay<br>Rainbow Lake         | Indian Cabins<br>Steen River | Meander River<br>Zama City         |
| Lac La Biche (2015)*                                                                     | Atmore<br>Hylo<br>Wandering River          | Beaver Lake<br>Imperial Mills | Breynat<br>Plamondon         | Fork Lake<br>Rich Lake             |
| John D'or Prairie (2014)**                                                               | Fox Lake                                   | Garden River                  |                              |                                    |
| Buffalo Lake (2013, 2014, 2015)**                                                        | Caslan                                     |                               |                              |                                    |
| Manning (2015)^                                                                          | Carcajou<br>North Star                     | Deadwood<br>Notikewin         | Hotchkiss<br>Twin Lakes      | Keg River                          |
| Peace River (2015)*^                                                                     | Cadotte Lake<br>Marie-Reine                | Chinook Valley<br>Nampa       | Dixonville<br>Reno           | Little Buffalo<br>St. Isidore      |
| Fort Vermilion (2014)*                                                                   | Rocky Lane                                 |                               |                              |                                    |
| La Crete (2014)                                                                          | Buffalo Head Prairie                       |                               |                              |                                    |
| Fishing Lake(2015)**                                                                     |                                            |                               |                              |                                    |
| Gift Lake (2015)**                                                                       |                                            |                               |                              |                                    |
| Elizabeth Settlement (2015)**                                                            |                                            |                               |                              |                                    |
| Grande Cache (2015)                                                                      |                                            |                               |                              |                                    |
| Kikino (2013, 2014, 2015)**                                                              |                                            |                               |                              |                                    |
| Jasper (2015)                                                                            |                                            |                               |                              |                                    |
| <b><i>The clinics below offered Colorectal and Breast Cancer Screening</i></b>           |                                            |                               |                              |                                    |
| High Level (2015)*                                                                       | Chatech<br>Paddle Prairie                  | Habay<br>Rainbow Lake         | Indian Cabins<br>Steen River | Meander River<br>Zama City         |
| Worsley (2015)                                                                           | Bear Canyon                                | Cherry Point                  | Cleardale                    | Eureka River                       |
| John D'or Prairie (2015)**                                                               | Fox Lake                                   | Garden River                  |                              |                                    |
| Fort Vermilion (2015)*                                                                   | Rocky Lane                                 |                               |                              |                                    |
| La Crete (2015)                                                                          | Buffalo Head Prairie                       |                               |                              |                                    |

\* Surrounding Aboriginal community.

\*\* Aboriginal community.

^ Surrounding Hutterite community.
